# Supplementary material
Source: PubMed Central journal article supplement (PMC2662080)
Supplement: M803347200_1.pdf [file M803347200_1.pdf]

## Supplemental Data

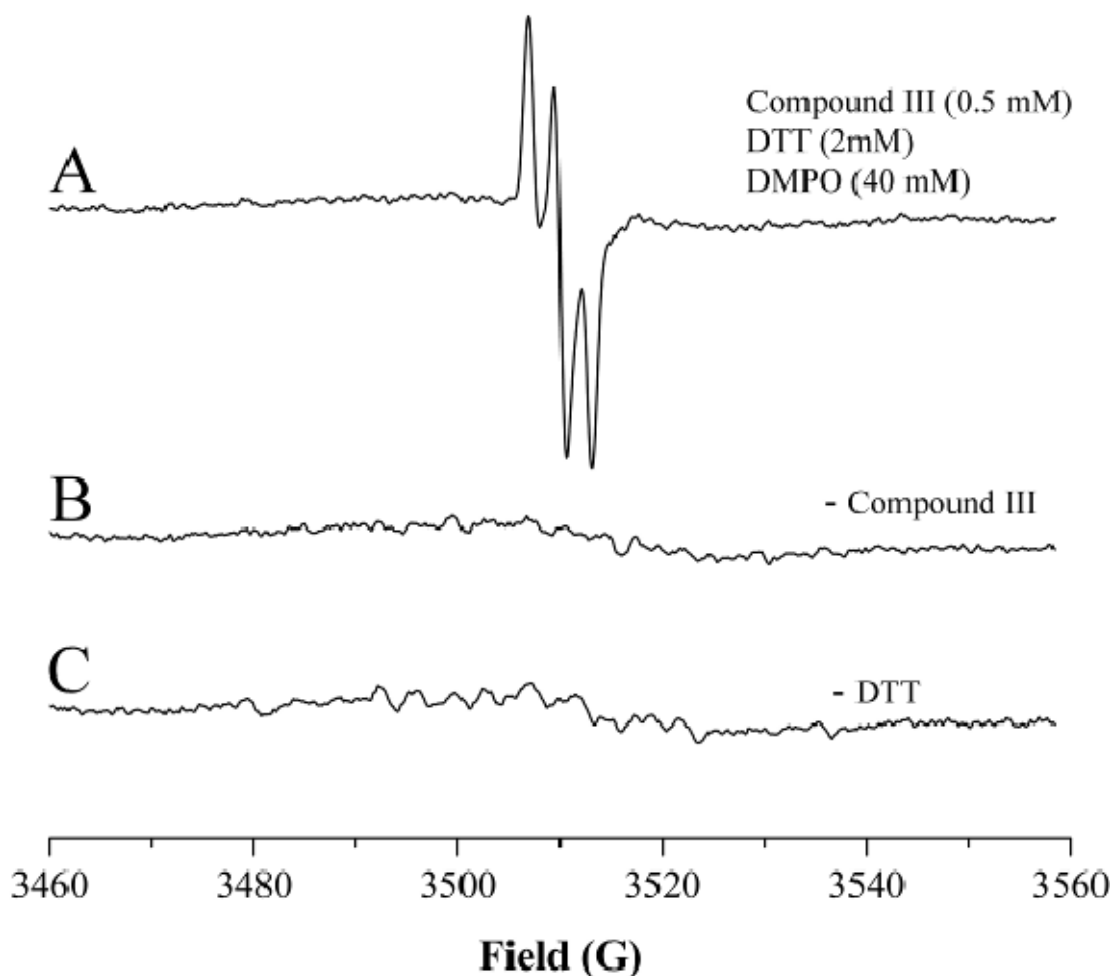

**Figure S1. ESR spin trapping of compound III-derived radicals with DMPO.** **A.** 0.5 mM compound III, 2 mM DTT and 40 mM DMPO in 50 mM NaCl, pH7.0, were mixed and transferred into 0.7 mm quartz capillary tubes. The experimental spectrum was recorded after signal averaging three scans at room temperature. **B.** Same as **A**, except that compound III was omitted from the system. **C.** Same as **A**, except that DTT was omitted from the system. ESR measurements were performed on a Bruker EMX-8/2.7 spectrometer (Bruker Instrument, Billerica, MA) operating at 9.857 GHz with 100 KHz modulation frequency. The samples were scanned at the following instrument settings: 100 G sweep width,  $3.99 \times 10^3$  gain, 6.3 mW microwave power, 41.9 s sweep time, 0.164 s time constant, and 1.0 G modulation amplitude.

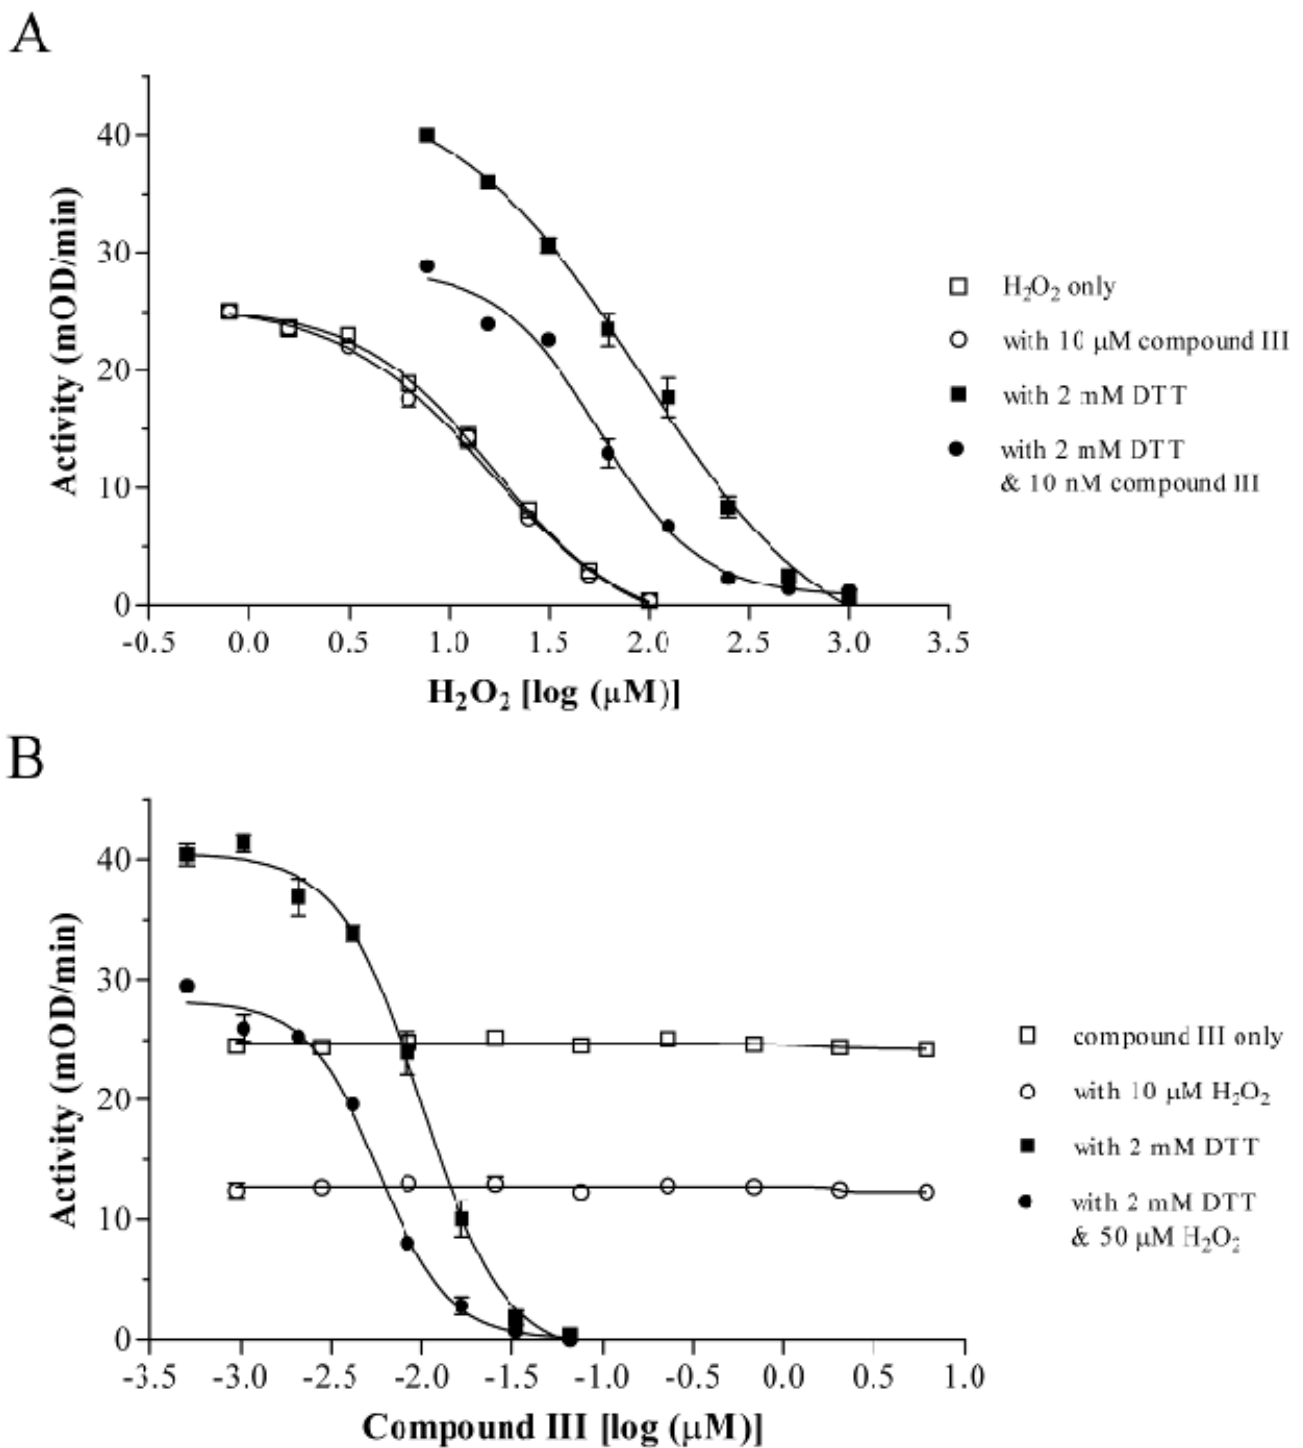

**Figure S2. Interaction of compound III and  $\text{H}_2\text{O}_2$  on inhibition of caspase-3.** **A.** Dose-dependent curves of caspase-3 inhibited by  $\text{H}_2\text{O}_2$ . Caspase-3 was incubated with 2 times-diluted  $\text{H}_2\text{O}_2$  with (○) or without (□) compound III in 2 mM DTT-contained (solid) or DTT-free (hollow) assay buffer for 15 min at room temperature. The residual caspase-3 activity was determined after incubation. **B.** Dose-dependent curves of caspase-3 inhibited by compound III. Caspase-3 was incubated with 2 or 3 times-diluted compound III with (○) or without (□)  $\text{H}_2\text{O}_2$  in 2 mM DTT-contained (solid) or DTT-free (hollow) assay buffer for 15 min at room temperature. The residual caspase-3 activity was determined after incubation.
